# Supplementary material
Source: PubMed Central journal article supplement (PMC5680036)
Supplement: NIHMS916366-supplement-supplement_1.pdf [file NIHMS916366-supplement-supplement_1.pdf]

### Supplemental Materials

**Table S-1. Eligibility Criteria, Definitions, and Changes Implemented During Systematic Review**

| CRITERION                                          | DEFINITION                                                                                                                                                                                                                                                                                                                                                                                                                                                                                                                                                                                                         | ADAPTATION/CHANGE                                                                                                                                                                                                                                                                          |
|----------------------------------------------------|--------------------------------------------------------------------------------------------------------------------------------------------------------------------------------------------------------------------------------------------------------------------------------------------------------------------------------------------------------------------------------------------------------------------------------------------------------------------------------------------------------------------------------------------------------------------------------------------------------------------|--------------------------------------------------------------------------------------------------------------------------------------------------------------------------------------------------------------------------------------------------------------------------------------------|
| <b>1. School -based</b>                            | Programs delivered on the school premises either during the regular hours of the school day or during the after school hours. The review will not include school programs that are considered “extracurricular,” such as athletics, arts, academic tutoring, mentoring, etc.                                                                                                                                                                                                                                                                                                                                       | Programs with primary components delivered mainly to parents, in home or community settings, were excluded.                                                                                                                                                                                |
| <b>2. Interactive</b>                              | Involve participants in skill-building and engagement with other participants, compared to programs that are more lecture-oriented in nature distinguished from non-interactive didactic-type programs characterized by a lecture-style emphasizing only knowledge and attitudinal development.                                                                                                                                                                                                                                                                                                                    |                                                                                                                                                                                                                                                                                            |
| <b>3. Middle school adolescents</b>                | Adolescents (aged 12-14) in middle school (grades 6-8) at the time of program delivery.                                                                                                                                                                                                                                                                                                                                                                                                                                                                                                                            | The primary program components must have been delivered during sixth, seventh, and eighth grade, and the majority of participants must be between ages 12 and 14.                                                                                                                          |
| <b>4. Measures alcohol or drug use or attitude</b> | The range of drug or alcohol use measured may include self-reported use of any illicit drugs or specific drugs (i.e., marijuana, cocaine, crack, methamphetamines, heroin, LSD, huffing glue or paint, etc.), abuse of prescription drugs, or alcohol. Behavioral measures may also include drug test results, official reports (by school, criminal record), or parent report. Only studies including sufficient statistical information from which to compute an effect size are eligible. Studies reporting insufficient information to determine the direction of the effect for the outcome will be excluded. | Refined attitudinal to mean intention to use and refusal/resistance skill measures. Refined usage to mean any drug use during trial period, coded as “initiation”, and usage during a defined recent time range during the trial period, such past 30 or 14 days, defined as “recent use”. |
| <b>5. Impact evaluation</b>                        | Studies must use a control or comparison group design that reports pretest and posttest measures. The                                                                                                                                                                                                                                                                                                                                                                                                                                                                                                              |                                                                                                                                                                                                                                                                                            |

| CRITERION                                | DEFINITION                                                                                                                                                                                                                                                                                                                                                                                                                                                                                                                   | ADAPTATION/CHANGE                                                                                                                                                                                                                                       |
|------------------------------------------|------------------------------------------------------------------------------------------------------------------------------------------------------------------------------------------------------------------------------------------------------------------------------------------------------------------------------------------------------------------------------------------------------------------------------------------------------------------------------------------------------------------------------|---------------------------------------------------------------------------------------------------------------------------------------------------------------------------------------------------------------------------------------------------------|
|                                          | control condition must be “treatment as usual”, placebo, wait list, no treatment, or minimal treatment. The control condition should be intended to avoid influencing behavioral change. Acceptable study designs may include those with 1) randomly controlled trials or random assignment to treatment and control groups; 2) matched pair treatment and control groups using statistical scoring; 3) quasi-experimental groups using statistical controls. Studies measuring outcomes on completers only will be excluded |                                                                                                                                                                                                                                                         |
| <b>6. English language North America</b> | Studies must have been conducted in North America and reported in English.                                                                                                                                                                                                                                                                                                                                                                                                                                                   |                                                                                                                                                                                                                                                         |
| <b>7. Since 1998</b>                     | Only studies reported or published between 1998 and 2014 will be included. This restriction is to focus on contemporary program designs that will have likely incorporated the knowledge of effectiveness of programs designed and evaluated prior to the mid-1990s. The 1998 cutoff is based on the review by Tobler, et al., (2000) which included studies published up to 1998.                                                                                                                                           | Only studies that were conducted during 1998 or later, published between 1998 and 2014. Final search conducted on March 06, 2014. Additional studies were identified and retrieved through bibliography searches during coding, through April 27, 2015. |
| <b>8. Published &amp; unpublished</b>    | Published and unpublished studies are eligible, including refereed journals, non-refereed journals, unpublished manuscripts or white papers, dissertations and theses, government reports, technical reports, conference presentations.                                                                                                                                                                                                                                                                                      |                                                                                                                                                                                                                                                         |

**Table S-2. Studies with Multiple Reports Combined to Yield One Independent Effect Size for Each Outcome**

| Study Name for Meta-Analysis                                                 | Studies Combined                                                                                                                                                                                                                                                                                                                                                                                                                                                                                                                |
|------------------------------------------------------------------------------|---------------------------------------------------------------------------------------------------------------------------------------------------------------------------------------------------------------------------------------------------------------------------------------------------------------------------------------------------------------------------------------------------------------------------------------------------------------------------------------------------------------------------------|
| <i>Outcomes reported at multiple follow-up periods</i>                       |                                                                                                                                                                                                                                                                                                                                                                                                                                                                                                                                 |
| Hecht, Graham, & Elek (2006)                                                 | Effect sizes from outcomes reported at 14 months using the full sample were combined with effects from intermediate outcomes in Hecht, Marsiglia, Elek, Wagstaff, Kulis, Dustman, & Miller-Day (2003).                                                                                                                                                                                                                                                                                                                          |
| Clark, Ringwalt, Hanley & Shamblen (2010)                                    | Effect sizes for intention and refusal skill outcomes at one and 12 months were combined.                                                                                                                                                                                                                                                                                                                                                                                                                                       |
| <i>Multiple outcomes reported for subgroups</i>                              |                                                                                                                                                                                                                                                                                                                                                                                                                                                                                                                                 |
| Eisen, Zellman, & Murray (2003)                                              | Effect sizes for one-year follow-up were combined with effect sizes from intermediate outcomes based on the full sample reported in Eisen, Zellman, Massett, & Murray (2002) and Eisen (2001), which reported user subgroup outcomes.                                                                                                                                                                                                                                                                                           |
| Griffin, Botvin, Nichols, & Doyle (2003)                                     | Effect sizes for a high-risk subsample were combined with effect sizes from Botvin, Griffin, Diaz, & Ifill-Williams (2001), which reported outcomes for the full sample.                                                                                                                                                                                                                                                                                                                                                        |
| Ringwalt, Clark, Hanley, Shamblen, & Flewelling (2010)                       | Effect sizes for cannabis use outcomes were combined with those effect sizes from Ringwalt, Kovach, Hanley, Shamblen, & Flewelling (2009).                                                                                                                                                                                                                                                                                                                                                                                      |
| Ellickson, McCaffrey, Gosh-Dastidar, & Longshore (2003)                      | Effect sizes for recent use and initiation outcomes at 18 months reported for separate risk-level groups were combined.                                                                                                                                                                                                                                                                                                                                                                                                         |
| Aseltine, Dupre, & Lamlein (2000)                                            | Effect sizes computed from outcomes reported for two treatment groups given variations of the same program compared to one control group were combined.                                                                                                                                                                                                                                                                                                                                                                         |
| McNeal, Hansen, Harrington, & Giles (2004)                                   | Effect sizes computed for total sample rather than two separate subsamples.                                                                                                                                                                                                                                                                                                                                                                                                                                                     |
| <i>Combination of reasons for multiple effect sizes from the same sample</i> |                                                                                                                                                                                                                                                                                                                                                                                                                                                                                                                                 |
| Bacon, Hall & Ferron (2013)                                                  | Effect sizes for outcomes at six months reported separately for risk-level subgroups which were combined.                                                                                                                                                                                                                                                                                                                                                                                                                       |
| Vicary, Smith, Swisher, Hopkins, Elek, Bechtel, & Henry (2006)               | Effects sizes for outcomes at 36 months reported separately for males and females in treatment groups given basic and enhanced versions of the same program were combined. Those effects sizes were then combined with effect sizes from outcomes in Vicary, Henry, Bechtel, Swisher, Smith, Wylie, & Hopkins (2004) and Smith, Swisher, Vicary, Bechtel, Minner, Henry & Palmer (2004), which reported outcomes at 24 months separately for males and females in two treatment groups with variations of the same program that |

| Study Name for Meta-Analysis                    | Studies Combined                                                                                                                                                                                                                                                                                                                      |
|-------------------------------------------------|---------------------------------------------------------------------------------------------------------------------------------------------------------------------------------------------------------------------------------------------------------------------------------------------------------------------------------------|
|                                                 | were compared to a single control group.                                                                                                                                                                                                                                                                                              |
| Longshore, Ellickson, McCaffrey, & Clair (2007) | Effect sizes for outcomes at 30 months were combined with those in Ghosh-Dastidar, Longshore, Ellickson, & McCaffrey (2004), which reported intent and refusal skill outcomes at 18 months follow-up, and Ellickson et al. (2003), which reported use outcomes at 18 months by separate risk-level subgroups that were also combined. |

**Table S-3. All Coded Effect Sizes for Cannabis Use Outcomes**

| Study (Author & Year)     | Subgroup                   | Outcome<br>Label | Sample Size |         | <i>d</i> | <i>SE</i> |
|---------------------------|----------------------------|------------------|-------------|---------|----------|-----------|
|                           |                            |                  | Treatment   | Control |          |           |
| Apsler et al. (2006)      | --                         | Recent Use       | 87          | 85      | 0.000    | 0.451     |
| Aseltine et al. (2000)    | Mentor added               | Initiation       | 76          | 118     | -0.296   | 0.214     |
| Aseltine et al. (2000)    | Standard                   | Initiation       | 122         | 118     | -0.156   | 0.216     |
| Bacon et al. (2013)       | High Risk, 1 month         | Initiation       | 5251        | 5262    | 0.000    | 0.028     |
| Bacon et al. (2013)       | High Risk, 6 months        | Initiation       | 5066        | 5097    | -0.260   | 0.028     |
| Bacon et al. (2013)       | Low Risk, 1 month          | Initiation       | 5251        | 5262    | 0.000    | 0.028     |
| Bacon et al. (2013)       | Low Risk, 6 months         | Initiation       | 5066        | 5097    | 0.000    | 0.028     |
| Bacon et al. (2013)       | Moderate Risk, 1 month     | Initiation       | 5251        | 5262    | 0.000    | 0.028     |
| Bacon et al. (2013)       | Moderate Risk, 6 months    | Initiation       | 5066        | 5097    | 0.000    | 0.028     |
| Botvin et al. (2001)      | --                         | Recent Use       | 2144        | 1477    | -0.061   | 0.057     |
| D'Amico et al. (2007)     | --                         | Recent Use       | 64          | 285     | -0.357   | 0.187     |
| DeWit et al. (2000)       | --                         | Recent Use       | 87          | 80      | -0.401   | 0.163     |
| Eisen (2001)              | Nonusers, 12 months        | Initiation       | 2416        | 2416    | -0.135   | 0.111     |
| Eisen et al. (2002)       | 1 month                    | Initiation       | 2438        | 2438    | -0.150   | 0.110     |
| Eisen et al. (2003)       | 12 months                  | Initiation       | 2732        | 2732    | -0.096   | 0.076     |
| Eisen et al. (2003)       | 12 months                  | Recent Use       | 2732        | 2732    | -0.137   | 0.082     |
| Ellickson et al. (2003)   | High Risk, 18 months       | Initiation       | 2553        | 1723    | -0.191   | 0.088     |
| Ellickson et al. (2003)   | Low Risk, 18 months        | Initiation       | 2553        | 1723    | -0.304   | 0.121     |
| Ellickson et al. (2003)   | Moderate Risk, 18 months   | Initiation       | 2553        | 1723    | -0.269   | 0.068     |
| Fosco et al. (2013)       | --                         | Recent Use       | 332         | 178     | -0.183   | 0.103     |
| Gottfredson et al. (2010) | --                         | Initiation       | 191         | 195     | -0.073   | 0.167     |
| Griffin et al. (2003)     | --                         | Recent Use       | 379         | 379     | -0.083   | 0.083     |
| Griffin et al. (2009)     | --                         | Recent Use       | 92          | 86      | -0.295   | 0.163     |
| Hecht et al. (2003)       | 2 months                   | Recent Use       | 1969        | 1969    | -0.021   | 0.049     |
| Hecht et al. (2003)       | 8 months                   | Recent Use       | 1910        | 1910    | -0.022   | 0.050     |
| Hecht et al. (2003)       | 14 months                  | Recent Use       | 1604        | 1604    | -0.116   | 0.052     |
| Hecht et al. (2006)       | 14 months                  | Recent Use       | 2143        | 1005    | -0.072   | 0.061     |
| Hecht et al. (2006)       | 14 months                  | Recent Use       | 2143        | 1005    | -0.099   | 0.061     |
| Longshore et al. (2007)   | Boys, Enhanced, 30 months  | Recent Use       | 208         | 305     | -0.163   | 0.138     |
| Longshore et al. (2007)   | Boys, Standard, 30 months  | Recent Use       | 266         | 305     | 0.081    | 0.131     |
| Longshore et al. (2007)   | Girls, Enhanced, 30 months | Recent Use       | 163         | 251     | -0.486   | 0.155     |
| Longshore et al. (2007)   | Girls, Standard, 30 months | Recent Use       | 191         | 251     | -0.072   | 0.149     |
| McNeal et al. (2004)      | --                         | Recent Use       | 342         | 911     | 0.008    | 0.181     |
| Parent (2010)             | --                         | Recent Use       | 67          | 62      | 0.616    | 0.216     |
| Ringwalt et al. (2009)    | 1 month                    | Initiation       | 2324        | 2358    | 0.052    | 0.170     |
| Ringwalt et al. (2010)    | 12 months                  | Initiation       | 2470        | 2470    | -0.062   | 0.085     |
| Slater et al. (2006)      | --                         | Initiation       | 2108        | 2108    | -0.010   | 0.062     |
| Sloboda et al. (2009)     | --                         | Initiation       | 5756        | 4678    | 0.017    | 0.040     |

| Study (Author & Year)     | Subgroup                    | Outcome    | Sample Size |         | <i>d</i> | <i>SE</i> |
|---------------------------|-----------------------------|------------|-------------|---------|----------|-----------|
|                           |                             | Label      | Treatment   | Control |          |           |
| Smith et al. (2004)       | Boys, Intensive, 24 months  | Initiation | 73          | 49      | -0.125   | 0.201     |
| Smith et al. (2004)       | Boys, Standard, 24 months   | Initiation | 57          | 49      | -0.131   | 0.208     |
| Smith et al. (2004)       | Girls, Intensive, 24 months | Initiation | 61          | 41      | -0.136   | 0.216     |
| Smith et al. (2004)       | Girls, Standard, 24 months  | Initiation | 48          | 41      | -0.144   | 0.224     |
| Spoth et al. (2008)       | --                          | Initiation | 428         | 347     | -0.144   | 0.088     |
| St. Pierre et al. (2005)  | --                          | Initiation | 597         | 597     | 0.114    | 0.098     |
| Turner-Musa et al. (2008) | --                          | Recent Use | 42          | 26      | 0.000    | 0.356     |
| Vicary et al. (2004)      | High Risk Girls, Intensive  | Recent Use | 22          | 24      | -0.590   | 0.312     |
| Vicary et al. (2004)      | High Risk Girls, Standard   | Recent Use | 22          | 24      | -0.199   | 0.300     |
| Vicary et al. (2004)      | Low Risk Girls, Intensive   | Recent Use | 106         | 74      | -0.102   | 0.171     |
| Vicary et al. (2004)      | Low Risk Girls, Standard    | Recent Use | 86          | 74      | -0.107   | 0.175     |
| Vicary et al. (2006)      | Boys, Intensive, 36 months  | Initiation | 81          | 55      | 0.118    | 0.192     |
| Vicary et al. (2006)      | Boys, Standard, 36 months   | Initiation | 64          | 55      | 0.125    | 0.198     |
| Vicary et al. (2006)      | Girls, Intensive, 36 months | Initiation | 68          | 46      | 0.129    | 0.207     |
| Vicary et al. (2006)      | Girls, Standard, 36 months  | Initiation | 53          | 46      | 0.136    | 0.214     |

**Table S-4. All Coded Effect Sizes for Intention to Use Cannabis Outcomes**

| Study (Author & Year)        | Subgroup                   | Sample Size |            | <i>d</i> | <i>SE</i> |
|------------------------------|----------------------------|-------------|------------|----------|-----------|
|                              |                            | Treatment   | Comparison |          |           |
| Clark et al. (2010)          | 1 month                    | 2900        | 2900       | -0.018   | 0.055     |
| Clark et al. (2010)          | 12 months                  | 2421        | 2421       | -0.019   | 0.056     |
| Eisen et al. (2003)          | Full sample, 12 months     | 2732        | 2732       | -0.013   | 0.050     |
| Ghosh-Dastidar et al. (2004) | Full sample, 18 months     | 2553        | 1723       | -0.080   | 0.052     |
| Longshore et al. (2007)      | Boys, Standard, 30 months  | 266         | 305        | 0.000    | 0.096     |
| Longshore et al. (2007)      | Boys, Enhanced, 30 months  | 208         | 305        | -0.080   | 0.100     |
| Longshore et al. (2007)      | Girls, Standard, 30 months | 191         | 251        | -0.080   | 0.106     |
| Longshore et al. (2007)      | Girls, Enhanced, 30 months | 163         | 251        | -0.300   | 0.110     |

**Table S-5. All Coded Effect Sizes for Cannabis Use Refusal Skills Outcomes**

| Study (Author & Year)        | Subgroup                   | Sample Size |            | <i>d</i> | <i>SE</i> |
|------------------------------|----------------------------|-------------|------------|----------|-----------|
|                              |                            | Treatment   | Comparison |          |           |
| Clark et al. (2010)          | 1 month                    | 2900        | 2900       | 0.018    | 0.049     |
| Clark et al. (2010)          | 12 months                  | 2421        | 2421       | -0.019   | 0.051     |
| Ghosh-Dastidar et al. (2004) | Full sample, 18 months     | 2553        | 1723       | 0.070    | 0.048     |
| Hecht et al. (2003)          | 2 months                   | 1969        | 1969       | 0.062    | 0.055     |
| Hecht et al. (2003)          | 8 months                   | 1910        | 1910       | 0.022    | 0.055     |
| Hecht et al. (2003)          | 14 months                  | 1604        | 1604       | 0.024    | 0.057     |
| Longshore et al. (2007)      | Boys, Standard, 30 months  | 266         | 305        | 0.030    | 0.089     |
| Longshore et al. (2007)      | Boys, Enhanced, 30 months  | 208         | 305        | -0.010   | 0.095     |
| Longshore et al. (2007)      | Girls, Standard, 30 months | 191         | 251        | 0.100    | 0.100     |
| Longshore et al. (2007)      | Girls, Enhanced, 30 months | 163         | 251        | -0.290   | 0.106     |
